# Supplementary material for: Hierarchically branched silver nanostructures (HBAgNSs) as surface plasmon regulating platforms for multiplexed colorimetric DNA detection
Source: Royal Society of Chemistry journal article supplement (doi:10.1039/c2jm33632d), 2012-01-01
Supplement: c2jm33632d.pdf [file c2jm33632d.pdf]

**Electronic Supplementary Information (ESI)**

**Hierarchically Branched Silver Nanostructures (HBAgNSs) as Surface Plasmon Regulating Platforms for Multiplexed Colorimetric DNA Detection**

*Sang Hun Han, La Seong Park and Jae-Seung Lee\**

Department of Materials Science and Engineering, Korea University,

Anam-dong, Seongbuk-gu, Seoul, Republic of Korea, 136-713

E-mail: [jslee79@korea.ac.kr](mailto:jslee79@korea.ac.kr)

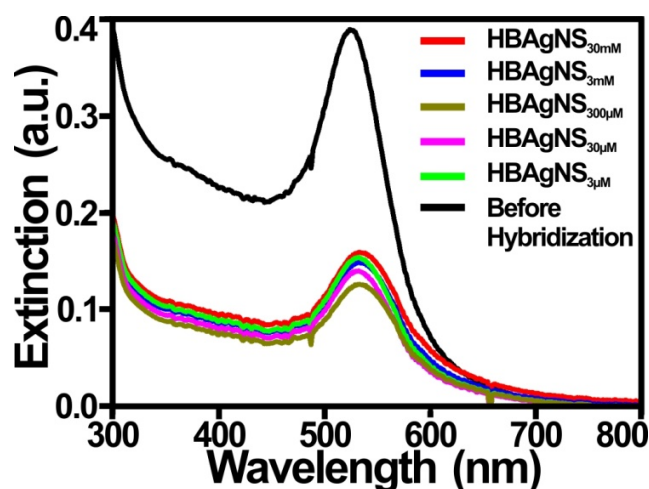

*Fig. 1S.* UV-vis spectra of unhybridized DNA-AuNP probes obtained from their mixtures with each type of HBAgNSs after hybridization. The [DNA-AuNP] before the hybridization was  $\sim 2$  nM (black curve). About 63% of the DNA-AuNPs are determined to hybridize with HBAgNSs on average. The DNA-AuNPs with HBAgNS<sub>300μM</sub> exhibit the lowest extinction, indicating that HBAgNS<sub>300μM</sub> has relatively the highest surface area. The difference in the portion of unhybridized DNA-AuNPs, however, is somewhat negligible, suggesting that the other HBAgNSs would give similar sensitivity and selectivity for the detection.

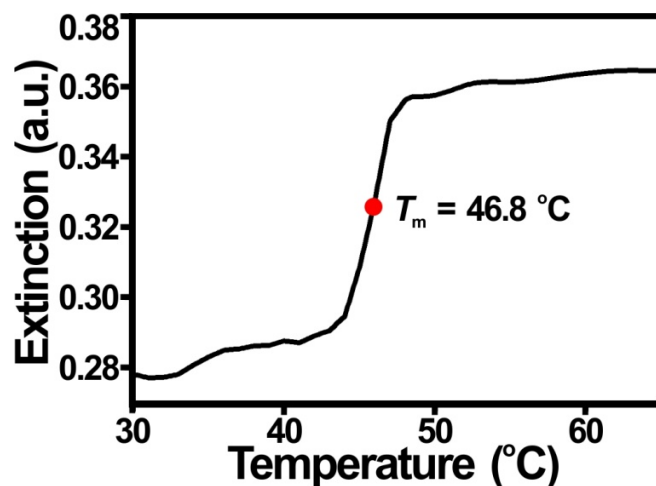

*Fig. 2S.* A melting transition obtained from the rehybridized DNA-HBAgNS<sub>300μM</sub> and DNA-AuNPs after their first melting. Note that the melting temperature ( $T_m$ ) slightly decreases from 48.4 °C to 46.8 °C, owing to the thermally induced DNA loss on the HBAgNS<sub>300μM</sub> surface.
